# Supplementary material
Source: PubMed Central journal article supplement (PMC11008285)

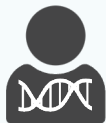

## Translational genetics

Fungal immunodeficiency  
Dermatophytosis

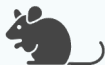

Card9  
R101C

### Signaling switch

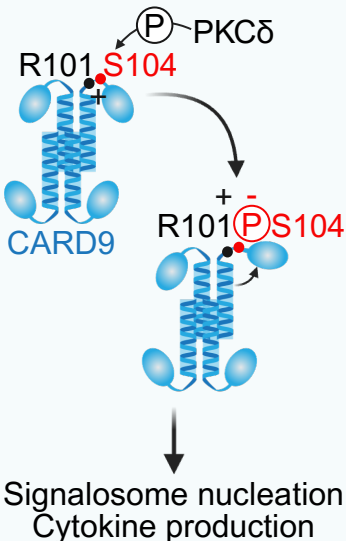

### Tissue immunity

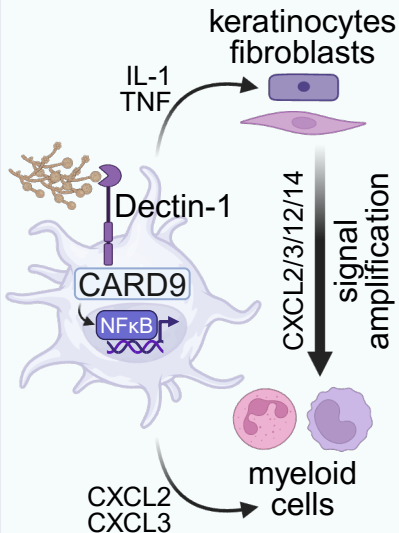

Supplement: NIHMS1979833-supplement-Graphical_abstract.pdf [file NIHMS1979833-supplement-Graphical_abstract.pdf]
